# Supplementary material
Source: Springer Nature journal article supplement (https://www.springermedizin.de/resource/supplementary/12913_2008_842_MOESM2_ESM.pdf/9535708)
Supplement: MOESM2 [file 9535708]

**Fixed components of Intervention:**

- Service provision (eg Toolkit)
- Promoting change (eg training for facilitator)

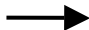

**Key Functions**

**Intervention Specific**

eg Facilitator promoting change  
eg Allocating a link worker to each general practice

**Generic Systems**

eg Proactive review of people with long term mental illness  
eg Discussion individual patients

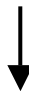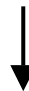

**Context dependent manifestation of key functions**

**Intervention specific**

(eg actual roles taken on by facilitator and link worker)

**Generic systems of shared care**

(eg way in which review of patients is organised)

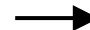

**Pre-defined and unanticipated outcomes**
